# Supplementary material for: Syntheses, structures and luminescent properties of six divalent metal terephthalate coordination polymers based on three new flexible bis(imidazole) ligands
Source: Royal Society of Chemistry journal article supplement (doi:10.1039/c4ce00635f), 2014-01-01
Supplement: c4ce00635f1.pdf [file c4ce00635f1.pdf]

## Supplementary Information

### Syntheses, structures and luminescent properties of six divalent metal terephthalate coordination polymers based on three new flexible bis(imidazole) ligands

Wei-Guan Yuan, Fang Xiong, Hong-Ling Zhang, Wei Tang, Shu-Fang Zhang, Zhan He, Lin-Hai Jing and Da-Bin Qin\*

*Key Laboratory of Chemical Synthesis and Pollution Control of Sichuan Province, School of*

*Chemistry and Chemical Engineering, China West Normal University, Nanchong 637002, P. R.*

*China. E-mail: [qdbkyl@cwnu.edu.cn](mailto:qdbkyl@cwnu.edu.cn) Fax: (+86)-817-256-8081.*

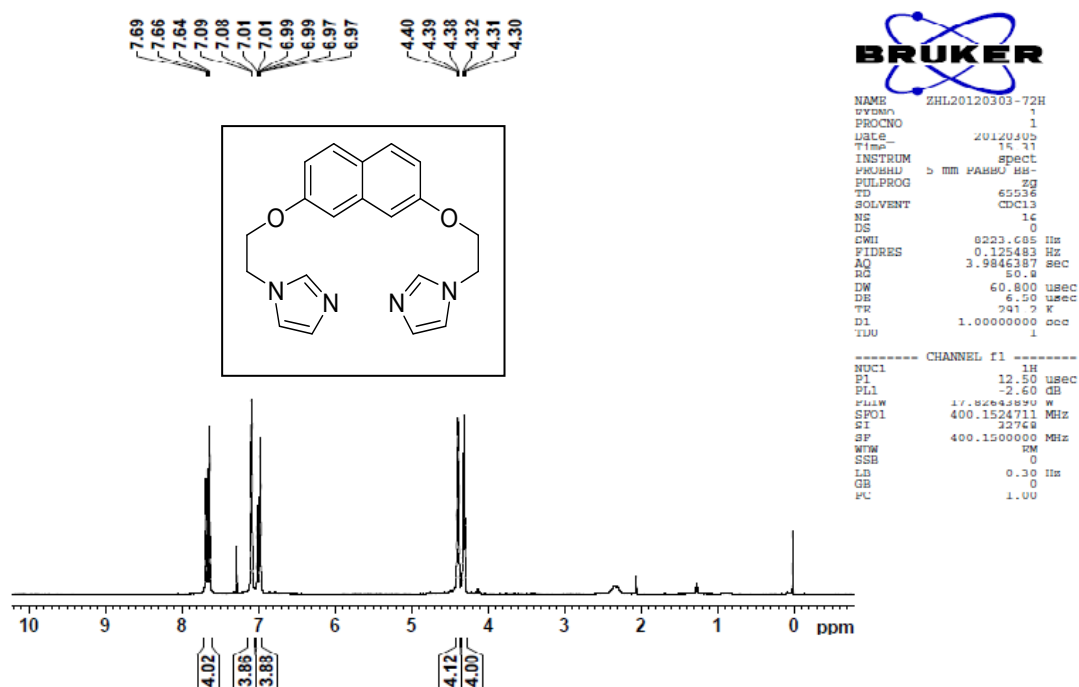

Fig. S1. The  $^1\text{H}$  NMR spectra of L1

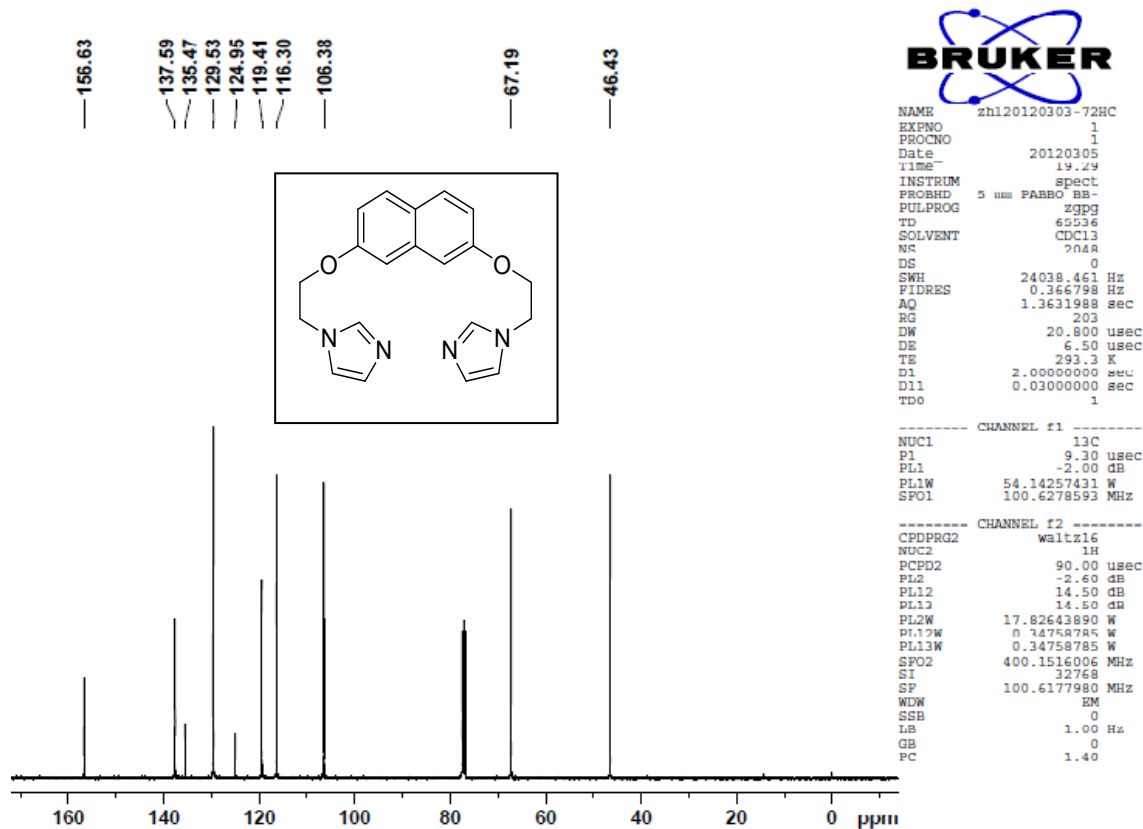

Fig. S2. The <sup>13</sup>C NMR spectra of L1

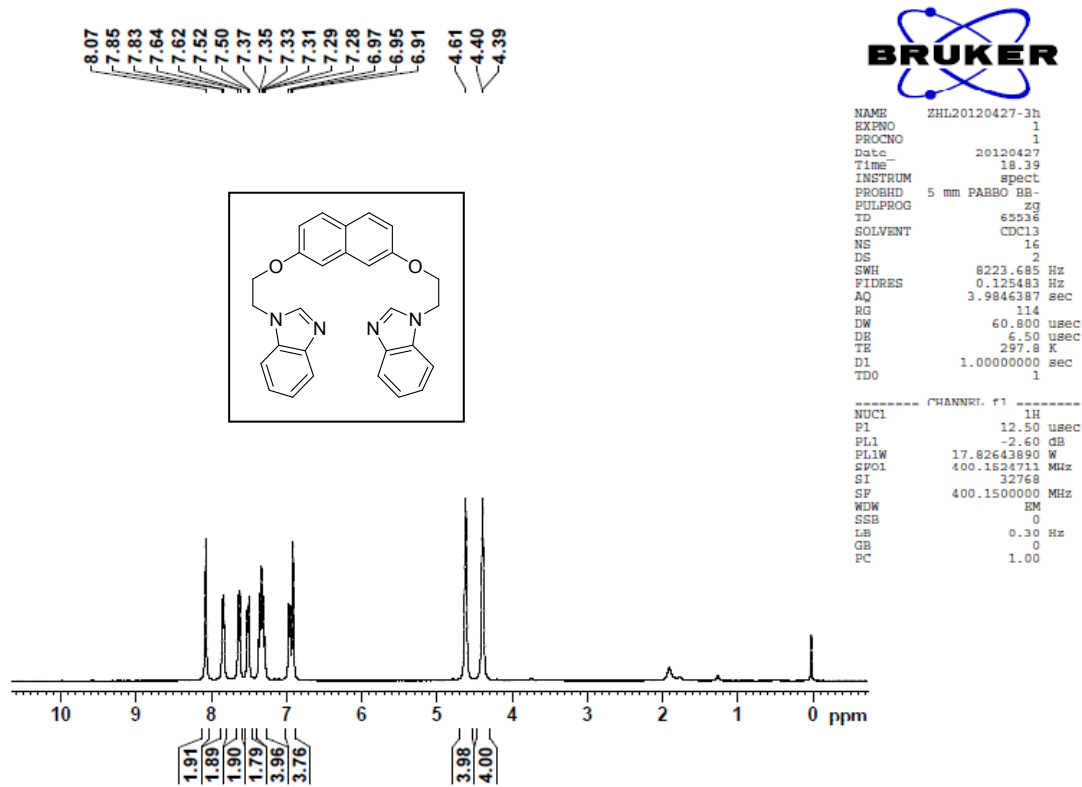

Fig. S3. The <sup>1</sup>H NMR spectra of L2

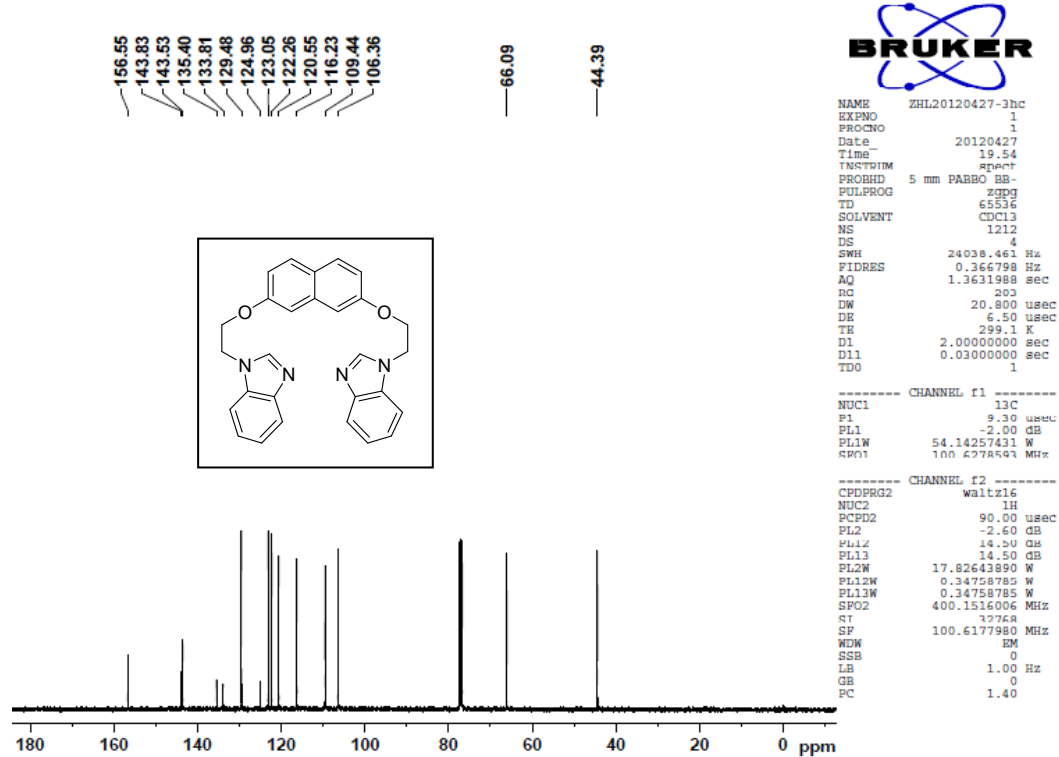

Fig. S4. The  $^{13}\text{C}$  NMR spectra of L2

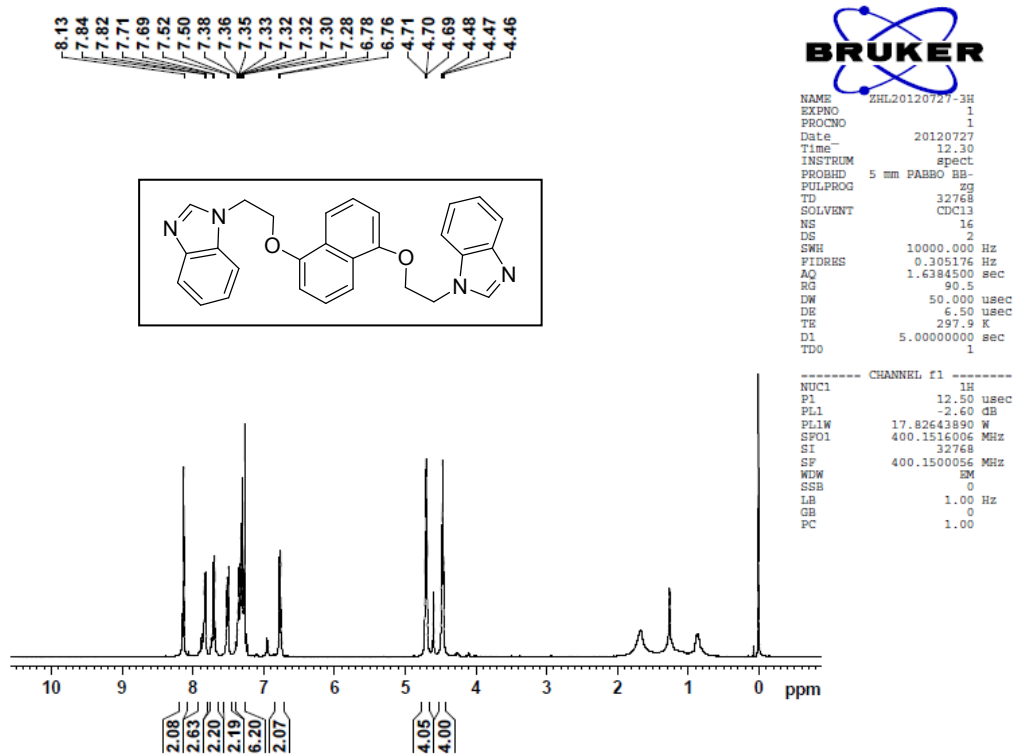

Fig. S5. The  $^1\text{H}$  NMR spectra of L3

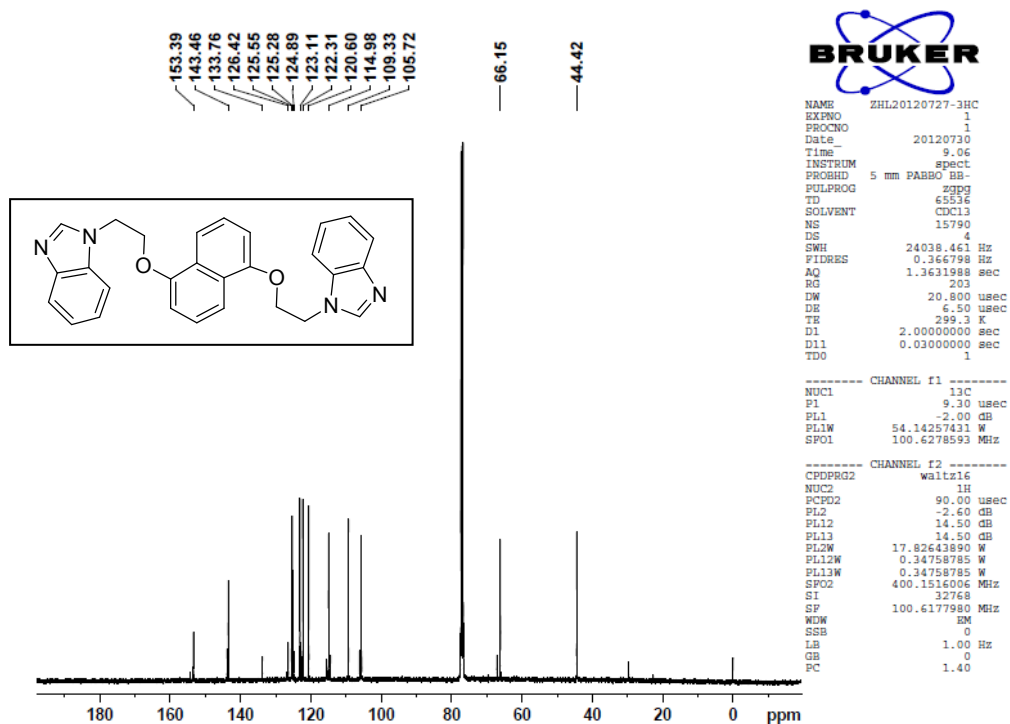

Fig. S6. The <sup>13</sup>C NMR spectra of L3

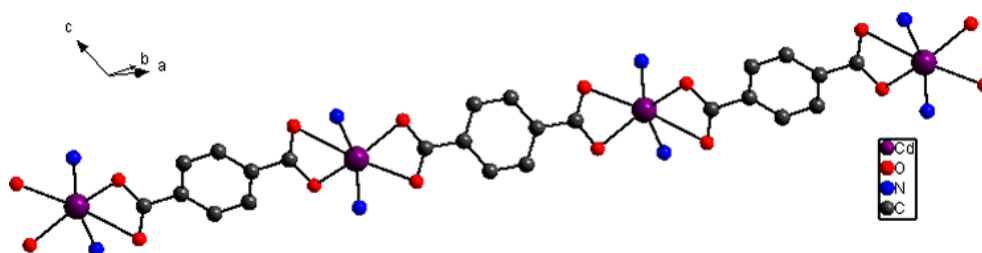

Fig. S7. View of the linear chain constructed by *p*-bdc<sup>2-</sup> ligands and Cd ions in compound 1

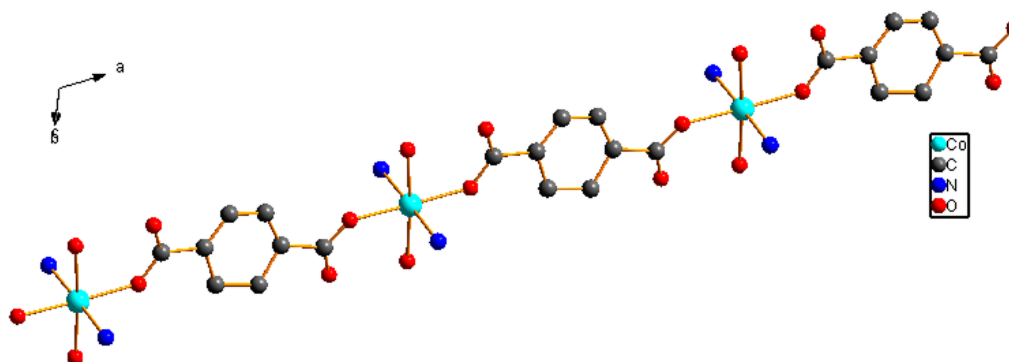

Fig. S8. View of the linear chain constructed by *p*-bdc<sup>2-</sup> ligands and Co ions in compound 2

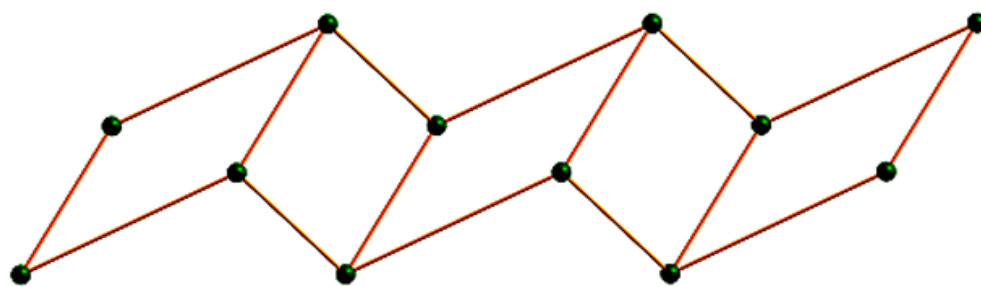

Fig. S9. Topological representation of 1D network of compound 3

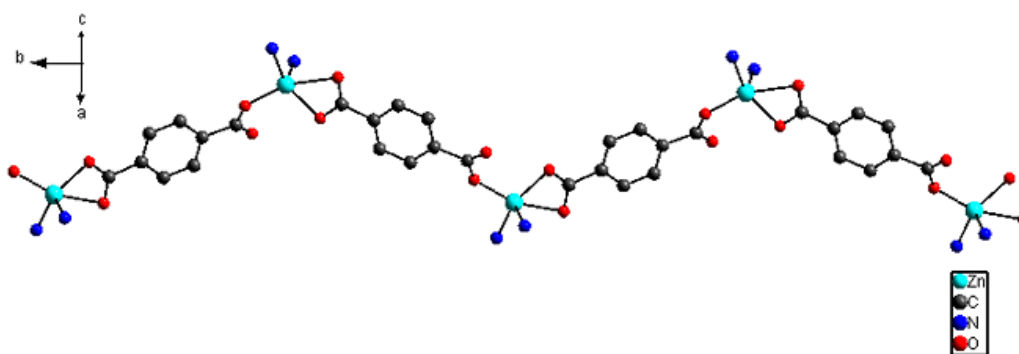

Fig. S10. Schematic view of a wavelike chain constructed by  $p\text{-bdc}^{2-}$  ligands and Zn cations in compound 4

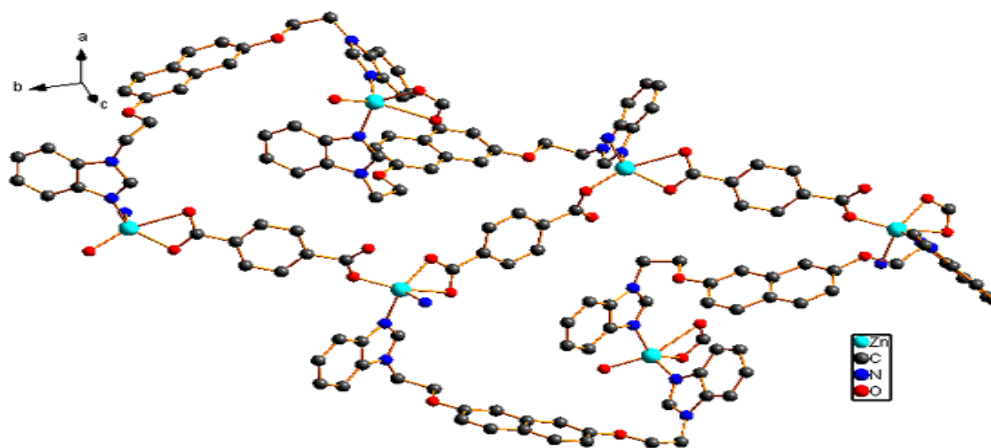

Fig. S11. Schematic representation of the basic building unit of 2D framework in compound 4

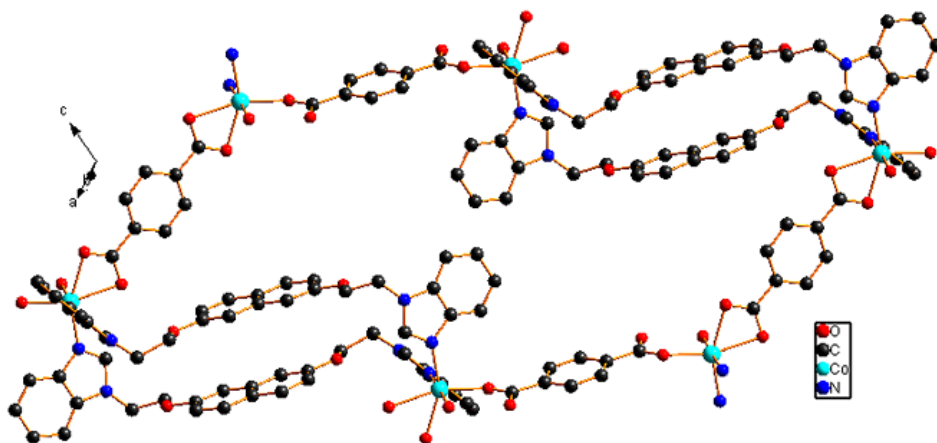

**Fig. S12.** Schematic representation of the basic building unit of 2D framework in compound **5**

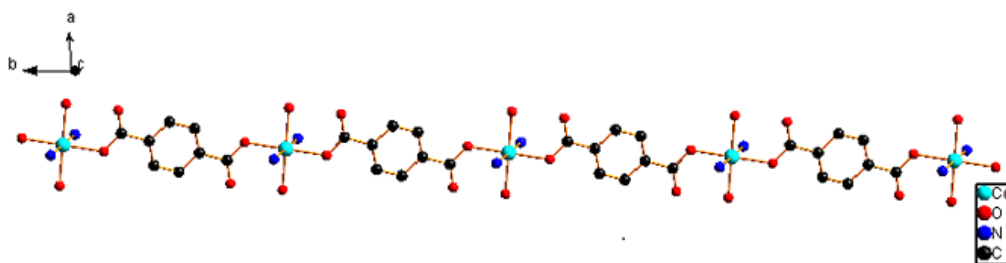

**Fig. S13.** Schematic view of a linear chain constructed by  $p\text{-bdc}^{2-}$  ligands and Co cations in compound **6**

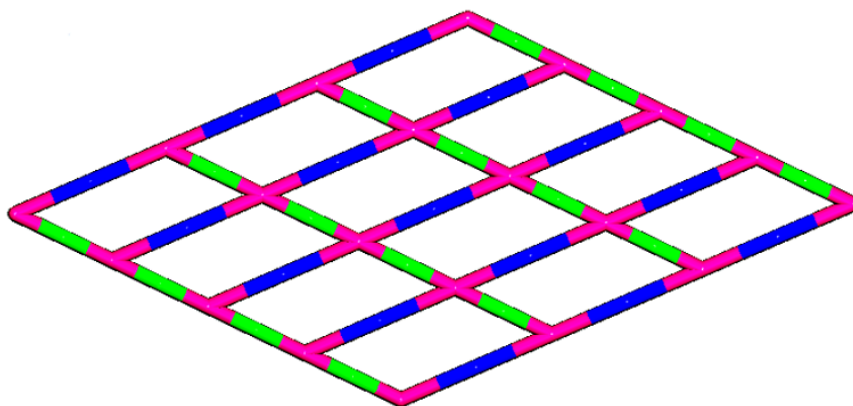

**Fig. S14.** Schematic representation of 2D topology of **6** (the pink sticks represent the Co center, green sticks represent the L3 ligand and the blue sticks represent  $p\text{-bdc}^{2-}$ ).

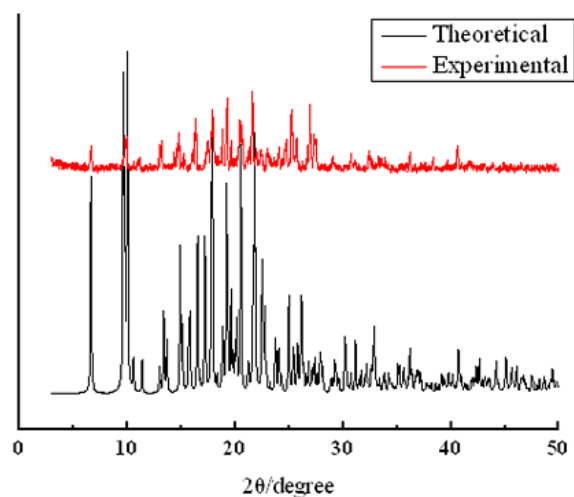

**Fig. S15.** The theoretical and experimental PXRD pattern of **1**

**Fig. S16.** The theoretical and experimental PXRD pattern of **2**

**Fig. S17.** The theoretical and experimental PXRD pattern of **3**

**Fig. S18.** The theoretical and experimental PXRD pattern of **4**

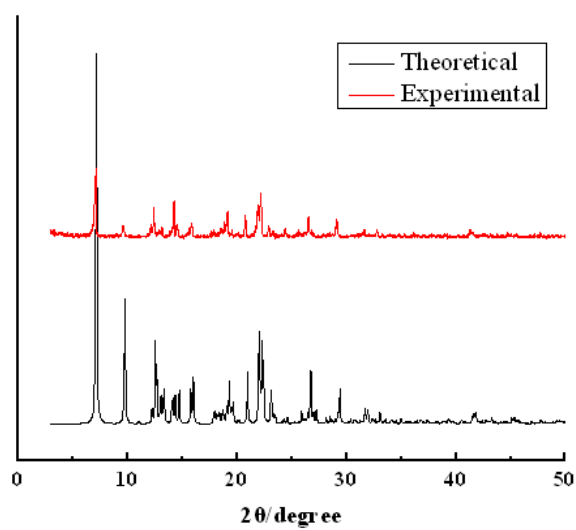

**Fig. S19.** The theoretical and experimental PXRD pattern of **5**

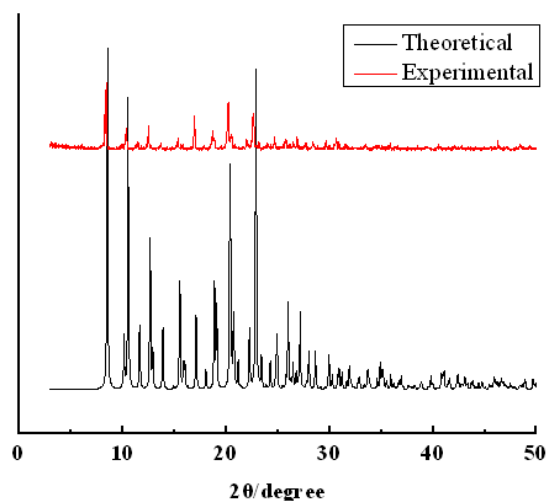

Fig. S20. The theoretical and experimental PXRD pattern of 6

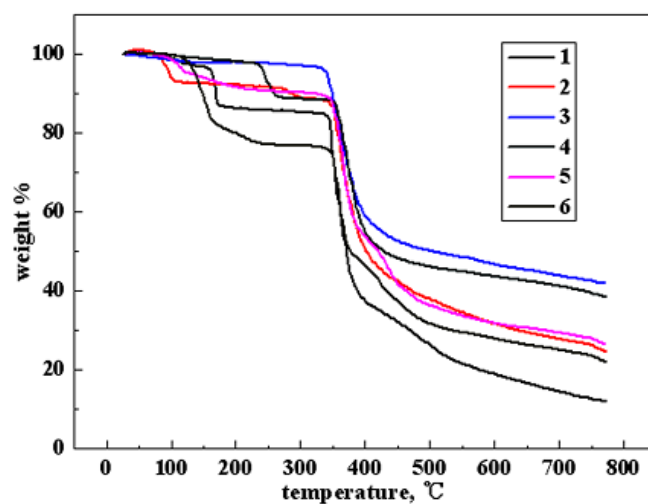

Fig. S21. TGA curves of compounds 1-6

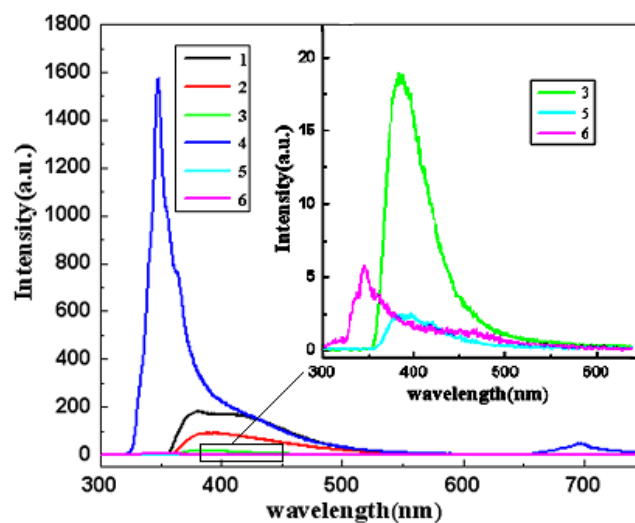

Fig. S22. Solid-state photoluminescence spectra for compounds 1-6



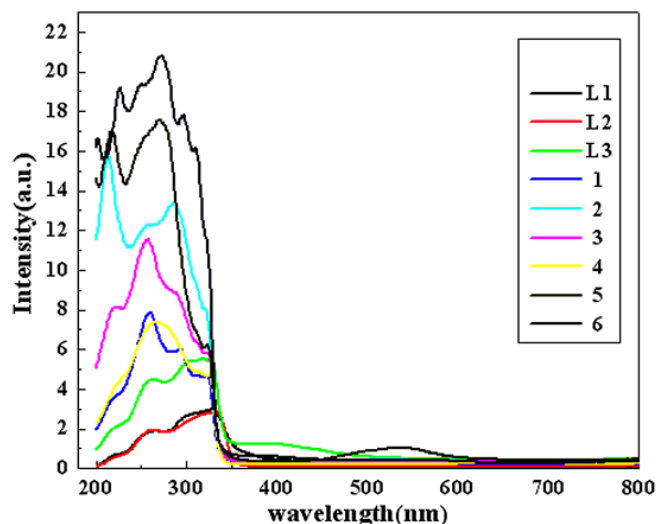

Fig. S23. Solid-state UV-vis diffuse reflectance spectra for compounds 1-6

**Table S1.** Selected bond distances (Å) and angles (°) for 1.

|                 |           |                 |            |
|-----------------|-----------|-----------------|------------|
| Cd(1)-O(5)      | 2.230(3)  | Cd(1)-N(1)      | 2.250(3)   |
| Cd(1)-O(3)      | 2.307(2)  | Cd(1)-N(4)      | 2.264(3)   |
| Cd(1)-O(4)      | 2.372(2)  |                 |            |
| O(5)-Cd(1)-N(1) | 120.38(9) | O(5)-Cd(1)-N(4) | 98.48(10)  |
| N(1)-Cd(1)-N(4) | 92.32(10) | O(5)-Cd(1)-O(3) | 116.06(10) |
| N(1)-Cd(1)-O(3) | 96.99(9)  | N(4)-Cd(1)-O(3) | 132.15(9)  |
| O(5)-Cd(1)-O(4) | 103.63(9) | N(1)-Cd(1)-O(4) | 135.64(9)  |
| N(4)-Cd(1)-O(4) | 86.20(9)  | O(3)-Cd(1)-O(4) | 55.33(8)   |

Symmetry transformations used to generate equivalent atoms: #1 $1+x, y, z$ ; #2 $x, 1.5-y, 0.5+z$ .

**Table S2.** Selected bond distances (Å) and angles (°) for 2.

|                 |          |                 |          |
|-----------------|----------|-----------------|----------|
| Co(1)-O(3)      | 2.083(6) | Co(1)-N(1)      | 2.089(8) |
| Co(1)-N(4)      | 2.095(8) | Co(1)-O(6)      | 2.116(6) |
| Co(1)-O(2W)     | 2.156(7) | Co(1)-O(1W)     | 2.158(7) |
| O(3)-Co(1)-N(1) | 90.8(3)  | O(3)-Co(1)-N(4) | 90.6(3)  |
| N(1)-Co(1)-N(4) | 178.5(3) | O(3)-Co(1)-O(6) | 176.6(3) |
| N(1)-Co(1)-O(6) | 90.7(3)  | N(4)-Co(1)-O(6) | 88.0(3)  |

|                   |          |                  |         |
|-------------------|----------|------------------|---------|
| O(3)-Co(1)-O(2W)  | 92.0(2)  | N(1)-Co(1)-O(2W) | 89.8(3) |
| N(4)-Co(1)-O(2W)  | 90.7(3)  | O(6)-Co(1)-O(2W) | 84.9(3) |
| O(3)-Co(1)-O(1W)  | 92.9(3)  | N(1)-Co(1)-O(1W) | 89.8(3) |
| N(4)-Co(1)-O(1W)  | 89.5(3)  | O(6)-Co(1)-O(1W) | 90.2(3) |
| O(2W)-Co(1)-O(1W) | 175.1(2) |                  |         |

Symmetry transformations used to generate equivalent atoms:  $^{\#1}x-2, y-1, z; ^{\#2}1-x, -y, 1-x, 3+z.$

**Table S3.** Selected bond distances (Å) and angles (°) for **3**.

|                                 |            |                                               |            |
|---------------------------------|------------|-----------------------------------------------|------------|
| Zn(1)-O5                        | 1.942(3)   | Zn(1)-N5                                      | 1.978(4)   |
| Zn(1)-N1                        | 1.982(4)   | Zn(1)-O3                                      | 1.987(3)   |
| Zn(2)-O9 <sup>#1</sup>          | 1.920(4)   | Zn(2)-O8                                      | 1.929(4)   |
| Zn(2)-N4 <sup>#1</sup>          | 1.957(5)   | Zn(2)-N8 <sup>#3</sup>                        | 1.968(4)   |
| O(5)- Zn(1)-N(5)                | 103.47(16) | O(5)- Zn(1)-N(1)                              | 108.85(16) |
| N(5)- Zn(1)-N(1)                | 120.20(17) | O(5)- Zn(1)-O(3)                              | 96.70(15)  |
| N(5)- Zn(1)-O(3)                | 109.43(15) | N(1)- Zn(1)-O(3)                              | 114.89(16) |
| O(9) <sup>#1</sup> - Zn(2)-O(8) | 96.81(16)  | O(9)- Zn(2)-N(4) <sup>#1</sup>                | 110.20(17) |
| O(8)- Zn(2)-N(4) <sup>#1</sup>  | 107.76(18) | O(9) <sup>#1</sup> - Zn(2)-N(8) <sup>#3</sup> | 112.77(18) |
| O(8)- Zn(2)-N(8) <sup>#3</sup>  | 116.32(17) | N(4) <sup>#1</sup> - Zn(2)-N(8) <sup>#3</sup> | 111.95(19) |

Symmetry transformations used to generate equivalent atoms:  $^{\#1}3-x, 1-y, 1-z; ^{\#2}x-2, y-1, z; ^{\#3}x+2, y+1, z.$

**Table S4.** Selected bond distances (Å) and angles (°) for **4**.

|                                 |            |                                                |            |
|---------------------------------|------------|------------------------------------------------|------------|
| Zn(1)-O4                        | 1.930(3)   | Zn(1)-N1                                       | 2.005(3)   |
| Zn(1)-O6 <sup>#1</sup>          | 2.007(4)   | Zn(1)- N4 <sup>#2</sup>                        | 2.033(3)   |
| Zn(1)-O5                        | 2.499(6)   |                                                |            |
| O(4)- Zn(1)-N(1)                | 115.58(13) | O(4)- Zn(1)- O(6)                              | 108.50(16) |
| N(1)- Zn(1)- O(6) <sup>#1</sup> | 104.17(14) | O(4)- Zn(1)- N(4)                              | 95.35(13)  |
| N(1)- Zn(1)- N(4)               | 102.83(13) | O(6) <sup>#1</sup> - Zn(1)- N(4) <sup>#2</sup> | 133.68(18) |
| O(6)- Zn(1)- N(5)               | 55.49(17)  | O(5)- Zn(1)- N(4)                              | 82.86(16)  |

|                   |            |                   |            |
|-------------------|------------|-------------------|------------|
| O(5)- Zn(1)- N(1) | 101.04(16) | O(5)- Zn(1)- O(4) | 146.81(16) |
| O(5)- Zn(1)- O(6) | 55.49(17)  |                   |            |

Symmetry transformations used to generate equivalent atoms: #11-x, -0.5+y, 1.5-z;  
#21.5-x, -0.5+y, z.

**Table S5.** Selected bond distances (Å) and angles (°) for **5**.

|                                |          |                                  |          |
|--------------------------------|----------|----------------------------------|----------|
| Co(1)-O5                       | 2.041(6) | Co(1)-N1                         | 2.087(7) |
| Co(1)- N4 <sup>#1</sup>        | 2.113(9) | Co(1)-O3                         | 2.169(5) |
| Co(1)-O4                       | 2.246(6) | Co(1)- O1W                       | 2.136(6) |
| O(5)-Co(1)-N(1)                | 101.6(3) | O(5)-Co(1)- N(4) <sup>#1</sup>   | 92.3(3)  |
| N(1)-Co(1)- N(4) <sup>#1</sup> | 89.4(3)  | O(5)-Co(1)- O(1W)                | 89.8(2)  |
| N(1)-Co(1)- O(1W)              | 91.7(3)  | N(4) <sup>#1</sup> -Co(1)- O(1W) | 177.4(3) |
| O(5)-Co(1)-O(3)                | 103.6(2) | N(1)-Co(1)-O(3)                  | 154.7(3) |
| N(4)-Co(1)-O(3)                | 90.8(3)  | O(1W)-Co(1)-O(3)                 | 87.4(2)  |
| O(5)-Co(1)-O(4)                | 162.2(2) | N(1)-Co(1)-O(4)                  | 95.4(2)  |
| N(4) <sup>#1</sup> -Co(1)-O(4) | 92.9(3)  | O(1W)-Co(1)-O(4)                 | 84.6(2)  |
| O(3)-Co(1)-O(4)                | 59.3(2)  |                                  |          |

Symmetry transformations used to generate equivalent atoms: #1-x, 1-y, -z.

**Table S6.** Selected bond distances (Å) and angles (°) for **6**.

|                                                |           |                                 |           |
|------------------------------------------------|-----------|---------------------------------|-----------|
| Co(1)-O2 <sup>#1</sup>                         | 2.097(3)  | Co(1)- O1W <sup>#1</sup>        | 2.098(4)  |
| Co(1)- N1 <sup>#1</sup>                        | 2.128(3)  |                                 |           |
| O(2) <sup>#1</sup> -Co(1)- O(2)                | 180.00(1) | O(2)-Co(1)- O(1W)               | 88.19(12) |
| O(2) <sup>#1</sup> -Co(1)- O(1W)               | 91.81(12) | O(1W)-Co(1)-O(1W)               | 180.00(1) |
| O(2) <sup>#1</sup> -Co(1)- N(1)                | 94.37(11) | O(2)-Co(1)- N(1) <sup>#1</sup>  | 85.63(11) |
| O(1W) <sup>#1</sup> -Co(1)- N(1) <sup>#1</sup> | 88.63(14) | O(1W)-Co(1)- N(1) <sup>#1</sup> | 91.37(14) |
| N(1) <sup>#1</sup> -Co(1)- N(1)                | 180.00(2) |                                 |           |

Symmetry transformations used to generate equivalent atoms: #1-x, -2-y, 2+z.
